# Supplementary figures and images for: Burst muscle performance predicts the speed, acceleration, and turning performance of Anna’s hummingbirds
Source: eLife journal article supplement (doi:10.7554/elife.11159), 2015-11-14

Figure 3 - supplement 1

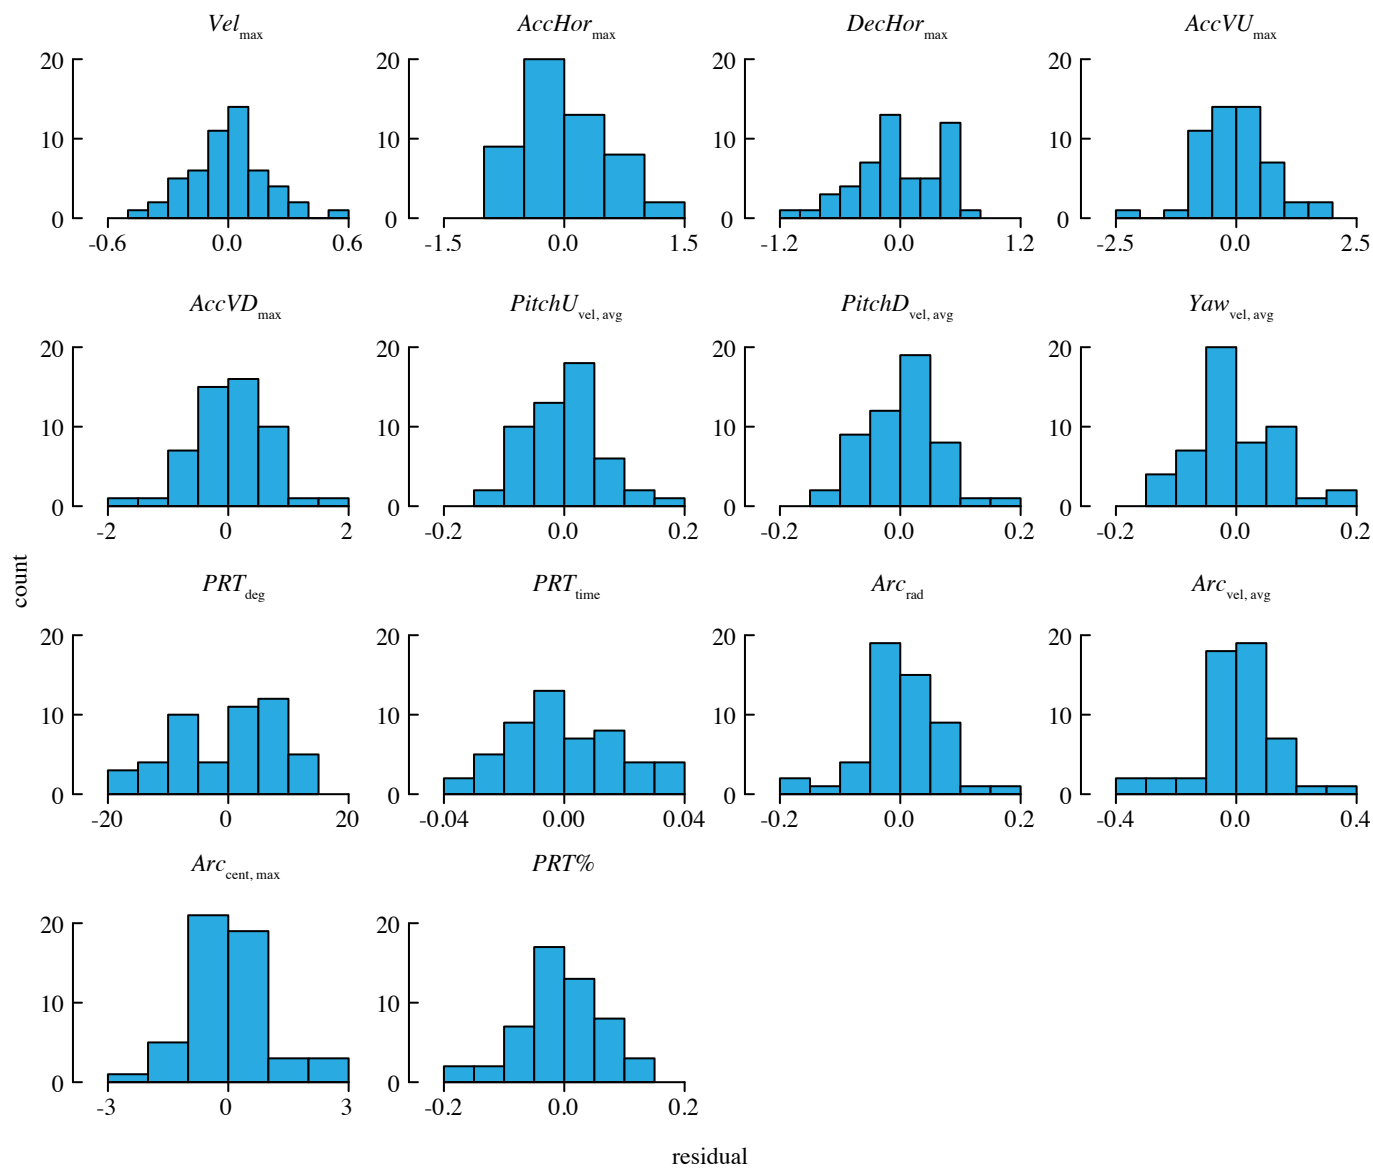

Supplement: supp [file elife-11159-supp-v1.zip]

**Figure 1 supplement 1**

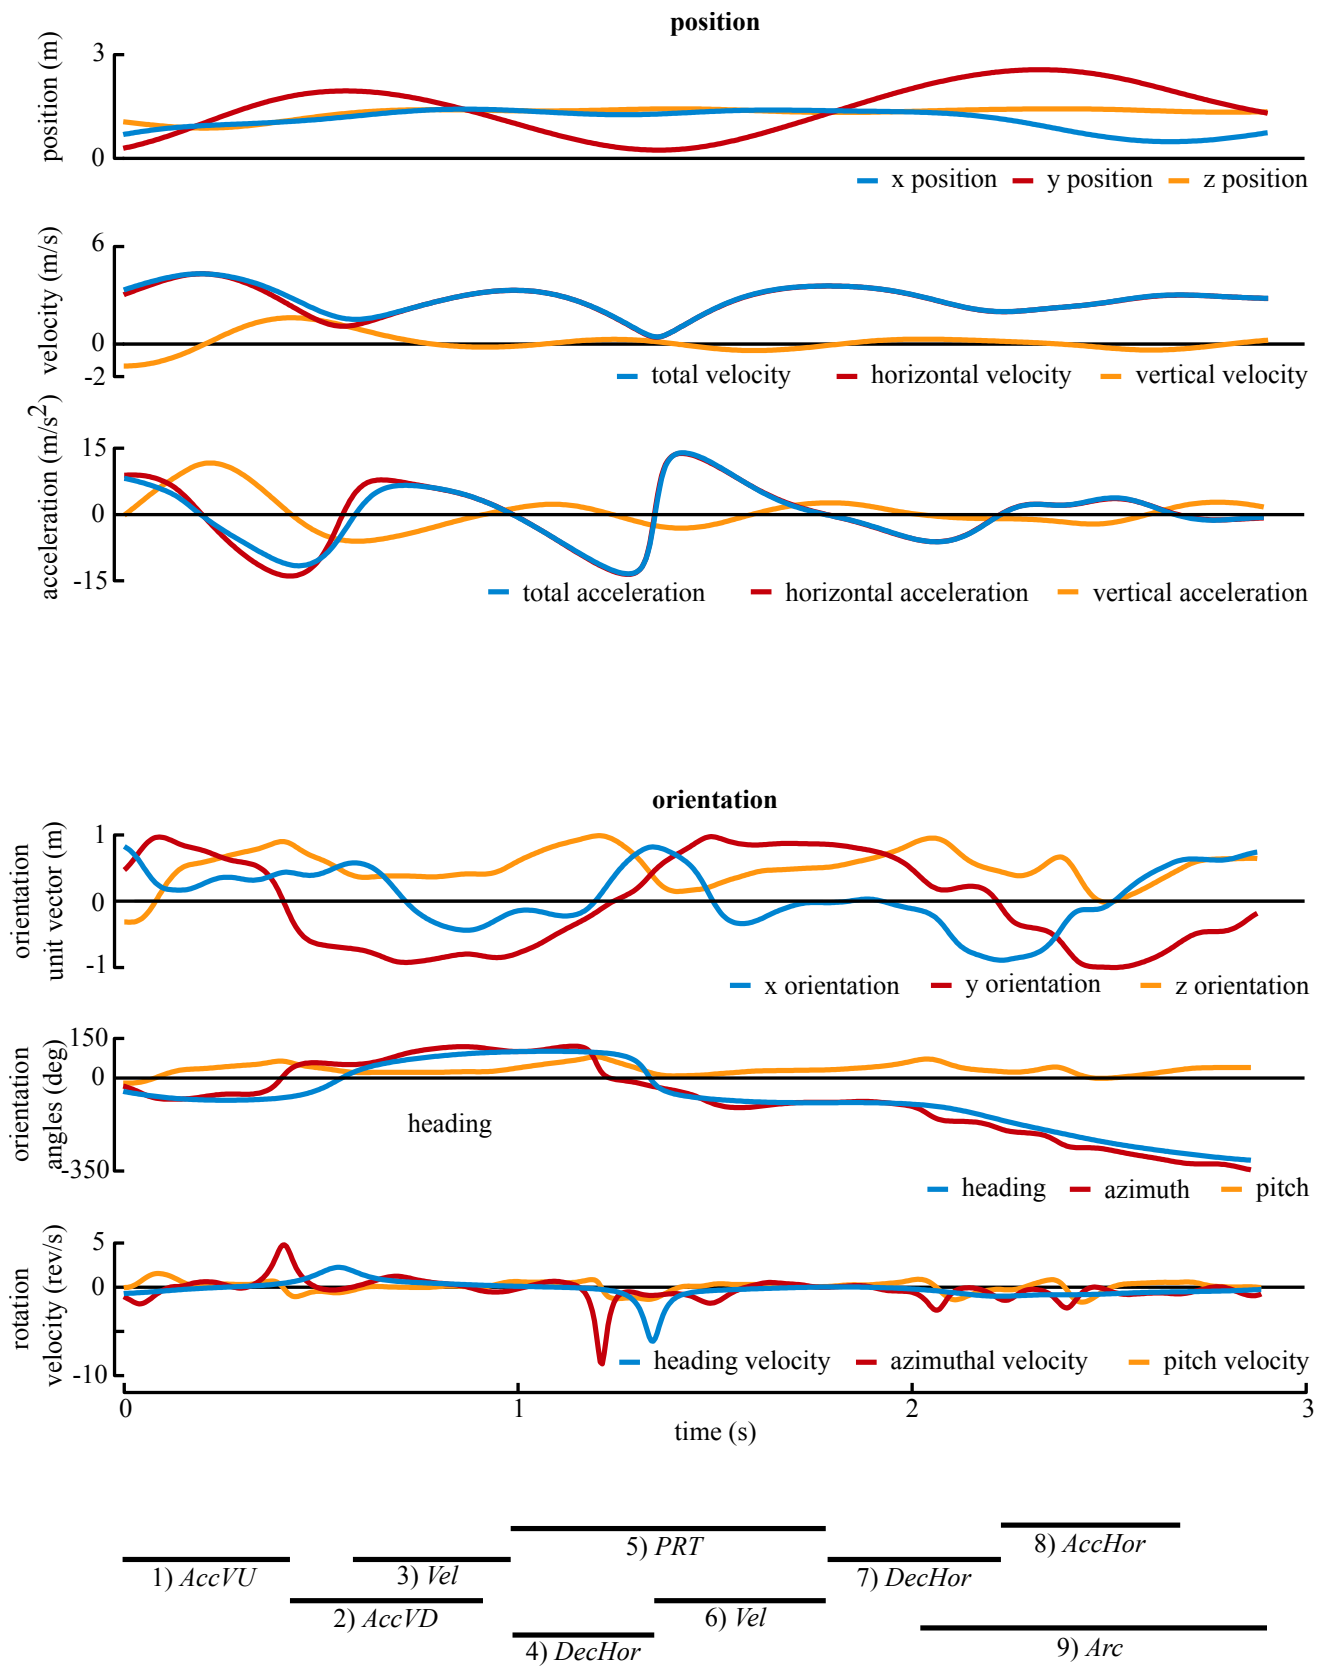

Supplement: supp [file elife-11159-supp-v1.zip]
